# Supplementary material
Source: MDPI journal article supplement (https://www.mdpi.com/2073-4344/13/6/939)
Supplement: s1 [file s1]

## Electronic Supporting Informations (ESI) -

### Cyclic carbonates through the photo-induced carboxylative cyclization of allylic alcohol with CO<sub>2</sub>: a comprehensive kinetic study of the reaction mechanism by in-situ ATR-IR spectroscopy.

Joseph Grondin, Christian Aupetit, Jean-Marc Vincent, Thierry Tassaing \*

*Institut des Sciences Moléculaires, UMR CNRS 5255, Université de Bordeaux, Bordeaux INP, 351 cours de la Libération 33405 Talence Cedex, France*

\* Corresponding author: [thierry.tassaing@u-bordeaux.fr](mailto:thierry.tassaing@u-bordeaux.fr)

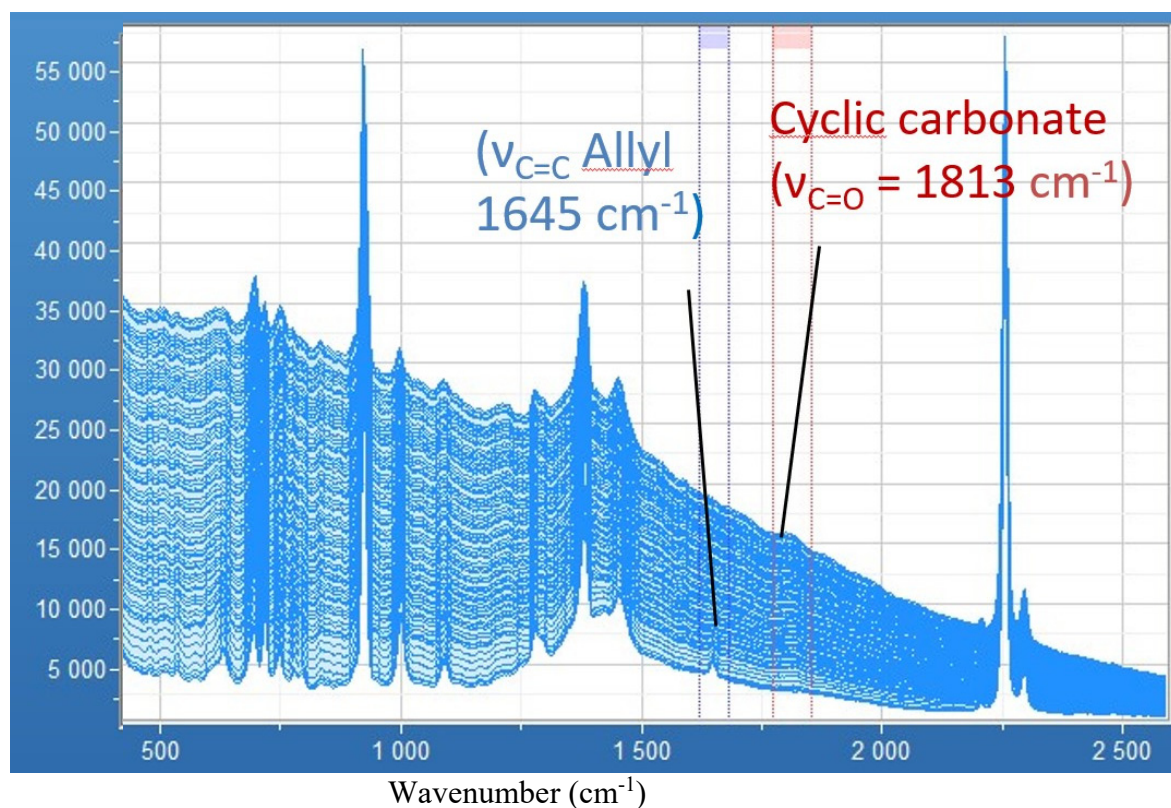

**Figure S1:** Evolution of the Raman spectra of the reaction medium during the reaction. Conditions: allyl alcohol (48  $\mu$ L, 0.5 mmol), DBU (1.05 equiv.), C<sub>4</sub>F<sub>9</sub>I (1.25 equiv.), CH<sub>3</sub>CN (1 mL), 25 °C, CO<sub>2</sub> (0.3 MPa), irradiation at 365 nm (LED) under stirring.

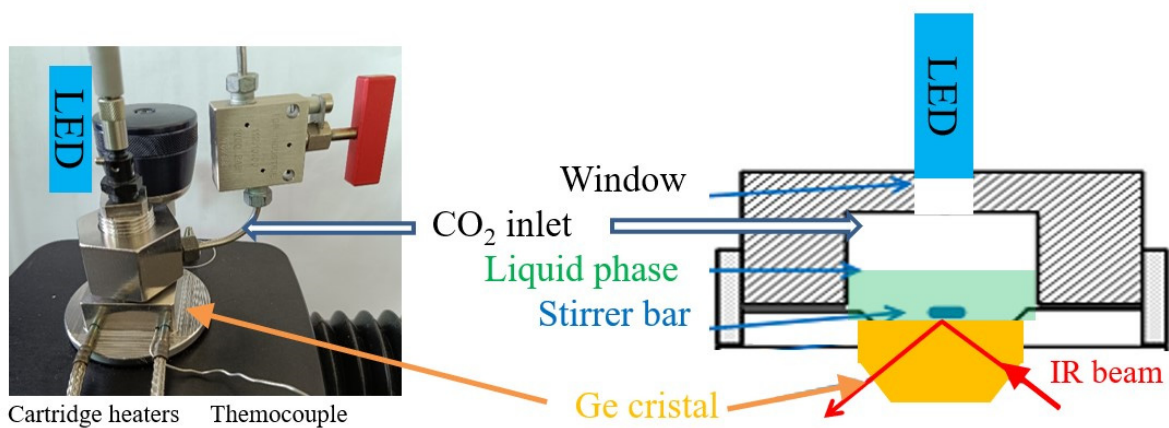

**Figure S2:** Scheme of the high-pressure ATR-IR set-up.
